# Supplementary material for: Preparation of complex multiblock copolymers via aqueous RAFT polymerization at room temperature
Source: Royal Society of Chemistry journal article supplement (doi:10.1039/c5py00478k), 2015-01-01
Supplement: c5py00478k1.pdf [file c5py00478k1.pdf]

## Supporting Information

Preparation of Complex Multiblock Copolymers *via* Aqueous RAFT at Room Temperature

*Liam Martin*<sup>1,‡</sup> *Guillaume Gody*<sup>1,‡</sup> and *Sébastien Perrier*<sup>1,2,\*</sup>

<sup>1</sup> Department of Chemistry, The University of Warwick, CV4 7AL, United Kingdom.

<sup>2</sup> Faculty of Pharmacy and Pharmaceutical Sciences, Monash University, VIC 3052, Australia.

<sup>‡</sup> - These authors contributed equally.

\* *s.perrier@warwick.ac.uk*, Tel: +44 2476 528085; Fax: +44 25476 524112

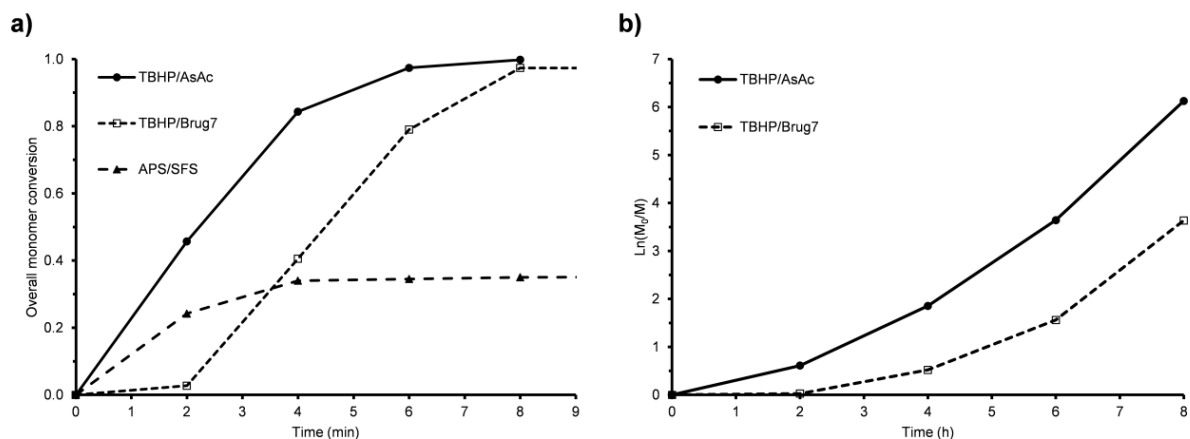

**Figure S1** - a) Monomer conversion vs time and b)  $\ln(M_0/M)$  vs time for RAFT of PNAM<sub>10</sub> in H<sub>2</sub>O/dioxane at 25 °C using different redox pairs as initiator.  $[NAM]_0 = 3$  M,  $[Ox]_0 = [Red]_0 = 3.0 \cdot 10^{-3}$  M, H<sub>2</sub>O:dioxane 70:30 (v:v), where  $[Ox]_0$  is the initial concentration of the oxidizing agent (TBHP or APS) and  $[Red]_0$  is the initial concentration of the reducing agent (AsAc, Brug7 or SFS).

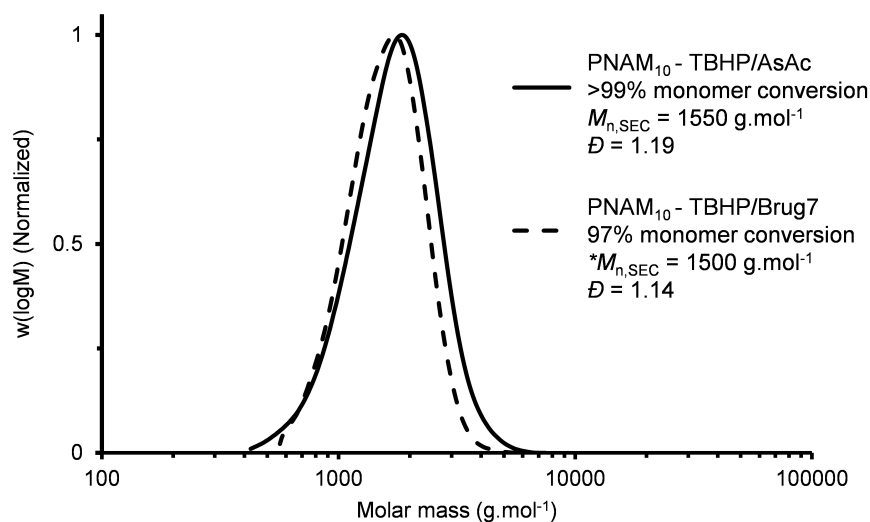

**Figure S2** - DMF-SEC analysis of PNAM<sub>10</sub> prepared after 24 h of RAFT in H<sub>2</sub>O/dioxane at 25 °C using TBHP/AsAc (solid line) and TBHP/Brug7 (dashed line) as redox initiator.  $[NAM]_0 = 3.0$  M,  $[TBHP]_0 = [Red]_0 = 3.0 \cdot 10^{-3}$  M, H<sub>2</sub>O:dioxane 70:30 (v:v), where  $[Red]_0$  is the initial concentration of the reducing agent (AsAc or Brug7). \* sample partially elutes with system peak at low molar mass.

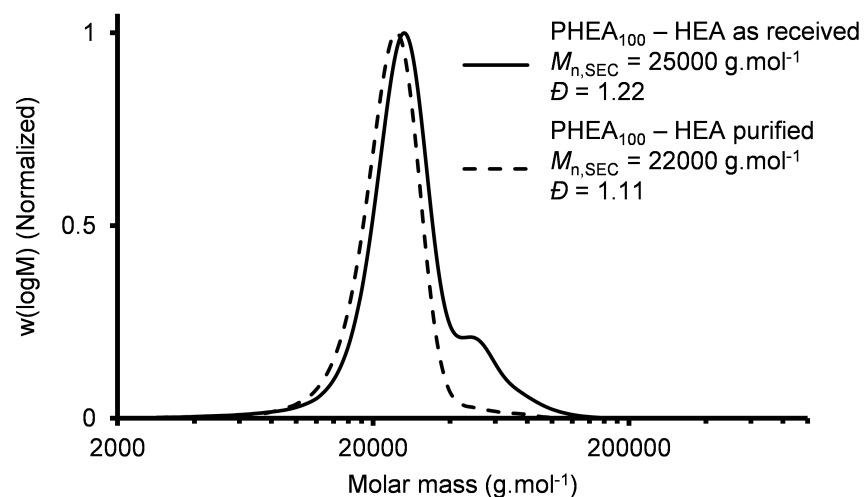

**Figure S3** - DMF-SEC of PHEA<sub>100</sub> prepared *via* RAFT in H<sub>2</sub>O/dioxane at 25 °C using TBHP/AsAc redox pair as initiator using HEA as received from Sigma Aldrich (solid line) and purified HEA (dashed line) [HEA]<sub>0</sub> = 3.0 M, [TBHP]<sub>0</sub> = 3.0 10<sup>-3</sup> M, [TBHP]<sub>0</sub>: [AsAc]<sub>0</sub> 1:0.5, [PABTC]<sub>0</sub>/[TBHP]<sub>0</sub> = 7.

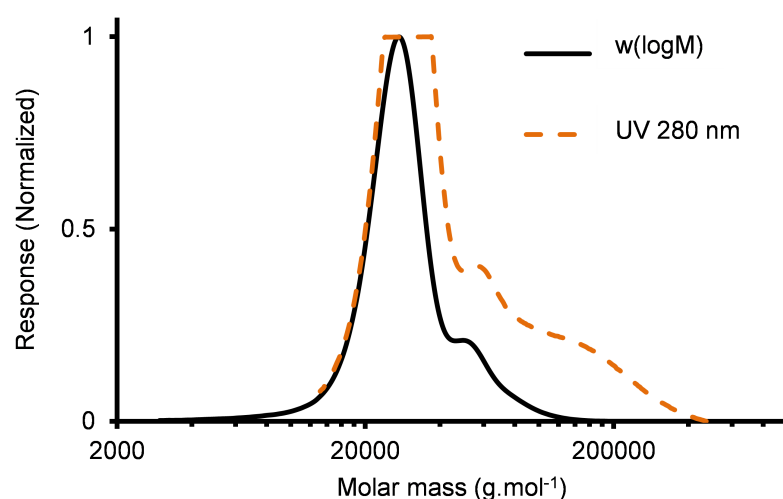

**Figure S4** - DMF-SEC analysis of PHEA<sub>100</sub> prepared *via* RAFT in H<sub>2</sub>O/dioxane at 25 °C using TBHP/AsAc redox pair as initiator using HEA as received from Sigma Aldrich. [HEA]<sub>0</sub> = 3.0 M, [TBHP]<sub>0</sub> = 3.0 10<sup>-3</sup> M, [TBHP]<sub>0</sub>: [AsAc]<sub>0</sub> 1:0.5, [PABTC]<sub>0</sub>/[TBHP]<sub>0</sub> = 7.

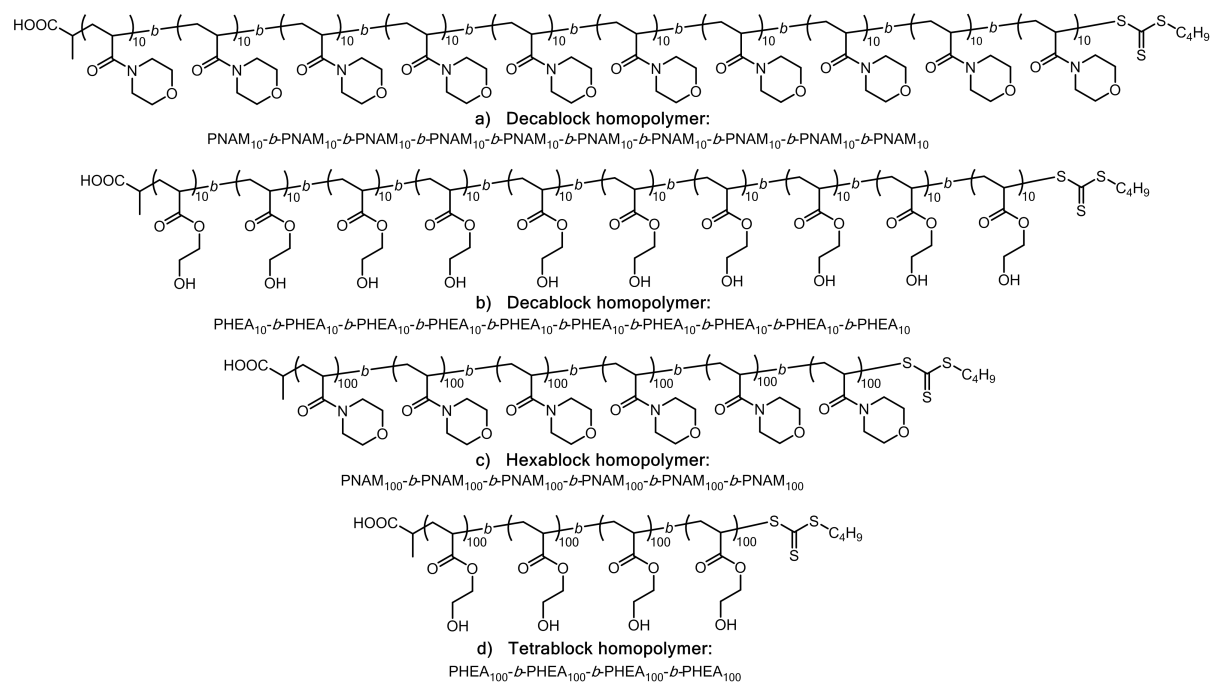

**Scheme S1** – Microstructures of multiblock homopolymers prepared in this work



**Table S1** - Conditions used in preparation of (PNAM<sub>10</sub>)<sub>10</sub> *via* RAFT in H<sub>2</sub>O/dioxane at 25 °C using TBHP/AsAc redox pair as initiator.

| Block                                                   | 1                     | 2                     | 3                     | 4                     | 5                     | 6                     | 7                     | 8                     | 9                     | 10                    |
|---------------------------------------------------------|-----------------------|-----------------------|-----------------------|-----------------------|-----------------------|-----------------------|-----------------------|-----------------------|-----------------------|-----------------------|
| Monomer                                                 | NAM                   |
| DP <sub>targeted</sub>                                  | 10                    | 10                    | 10                    | 10                    | 10                    | 10                    | 10                    | 10                    | 10                    | 10                    |
| m <sub>monomer added</sub> (mg)                         | 400.0                 | 400.0                 | 400.0                 | 400.0                 | 400.0                 | 400.0                 | 400.0                 | 400.0                 | 400.0                 | 400.0                 |
| m <sub>CTA added</sub> (mg)                             | 67.6                  | -                     | -                     | -                     | -                     | -                     | -                     | -                     | -                     | -                     |
| m <sub>TBHP added</sub> (mg)                            | 0.51                  | 0.17                  | 0.26                  | 0.32                  | 0.43                  | 0.51                  | 0.64                  | 0.73                  | 0.75                  | 0.75                  |
| m <sub>AsAc added</sub> (mg)                            | 0.50                  | 0.17                  | 0.25                  | 0.31                  | 0.42                  | 0.50                  | 0.62                  | 0.71                  | 0.73                  | 0.73                  |
| V <sub>H<sub>2</sub>O added</sub> (mL)                  | 0.412                 | 0.588                 | 0.588                 | 0.588                 | 0.588                 | 0.588                 | 0.588                 | 0.453                 | 0.453                 | 0.453                 |
| V <sub>dioxane added</sub> (mL)                         | 0.176                 | -                     | -                     | -                     | -                     | -                     | -                     | -                     | -                     | -                     |
| % H <sub>2</sub> O                                      | 70.1                  | 85.0                  | 90.0                  | 92.5                  | 94.0                  | 95.0                  | 95.7                  | 96.1                  | 96.5                  | 96.8                  |
| V <sub>total</sub> (mL) <sup>a</sup>                    | 0.945                 | 1.889                 | 2.883                 | 3.778                 | 4.722                 | 5.667                 | 6.611                 | 7.421                 | 8.231                 | 9.040                 |
| [Mon] <sub>0</sub> (mol.L <sup>-1</sup> ) <sup>b</sup>  | 3.00                  | 1.50                  | 1.00                  | 0.75                  | 0.60                  | 0.50                  | 0.43                  | 0.38                  | 0.34                  | 0.31                  |
| [TBHP] <sub>0</sub> (mol.L <sup>-1</sup> ) <sup>c</sup> | 6.00 10 <sup>-3</sup> | 1.00 10 <sup>-3</sup> | 1.00 10 <sup>-3</sup> | 9.38 10 <sup>-4</sup> | 1.00 10 <sup>-3</sup> | 1.00 10 <sup>-3</sup> | 1.07 10 <sup>-3</sup> | 1.09 10 <sup>-3</sup> | 1.01 10 <sup>-3</sup> | 9.22 10 <sup>-4</sup> |
| [AsAc] <sub>0</sub> (mol.L <sup>-1</sup> ) <sup>c</sup> | 3.00 10 <sup>-3</sup> | 5.00 10 <sup>-4</sup> | 5.00 10 <sup>-4</sup> | 4.69 10 <sup>-4</sup> | 5.00 10 <sup>-4</sup> | 5.00 10 <sup>-4</sup> | 5.36 10 <sup>-4</sup> | 5.46 10 <sup>-4</sup> | 5.07 10 <sup>-4</sup> | 4.61 10 <sup>-4</sup> |
| [PABTC] <sub>0</sub> /[TBHP] <sub>0</sub> <sup>d</sup>  | 50                    | 150                   | 100                   | 80                    | 60                    | 50                    | 40                    | 35                    | 34                    | 34                    |

<sup>a</sup> Represents the sum of the volume of the monomer added + volume of solvent + V<sub>total</sub> from the previous block. <sup>b</sup> Represents the concentration of the monomer at the beginning of each block extension. <sup>c</sup> The concentration of TBHP/AsAc at the beginning of each block, assuming full consumption of both TBHP and AsAc in the previous block. <sup>d</sup> The theoretical ratio of PABTC chain transfer agent to TBHP oxidant, assuming full consumption of TBHP in previous block.

**Table S2** - Monomer conversion and THF-SEC analysis of (PNAM<sub>10</sub>)<sub>10</sub> prepared *via* RAFT in H<sub>2</sub>O/dioxane at 25 °C using TBHP/AsAc redox pair as initiator.

| Block | Multiblock poly(4-acryloylmorpholine)<br>composition                                                                                                                                                                                                                                                      | Overall<br>monomer<br>conversion<br>(%) <sup>a</sup> | $M_{n,th}$<br>(g.mol <sup>-1</sup> ) <sup>b</sup> | $M_{n,SEC}$<br>(g.mol <sup>-1</sup> ) <sup>c</sup> | $\bar{D}$ <sup>c</sup> |
|-------|-----------------------------------------------------------------------------------------------------------------------------------------------------------------------------------------------------------------------------------------------------------------------------------------------------------|------------------------------------------------------|---------------------------------------------------|----------------------------------------------------|------------------------|
| 1     | PNAM <sub>10</sub>                                                                                                                                                                                                                                                                                        | >99                                                  | 1600                                              | 1000                                               | 1.17                   |
| 2     | PNAM <sub>10</sub> - <i>b</i> -PNAM <sub>10</sub>                                                                                                                                                                                                                                                         | >99                                                  | 3000                                              | 1700                                               | 1.15                   |
| 3     | PNAM <sub>10</sub> - <i>b</i> -PNAM <sub>10</sub> - <i>b</i> -PNAM <sub>10</sub>                                                                                                                                                                                                                          | >99                                                  | 4400                                              | 2500                                               | 1.16                   |
| 4     | PNAM <sub>10</sub> - <i>b</i> -PNAM <sub>10</sub> - <i>b</i> -PNAM <sub>10</sub> - <i>b</i> -PNAM <sub>10</sub>                                                                                                                                                                                           | 96.5                                                 | 5800                                              | 3500                                               | 1.18                   |
| 5     | PNAM <sub>10</sub> - <i>b</i> -PNAM <sub>10</sub> - <i>b</i> -PNAM <sub>10</sub> - <i>b</i> -PNAM <sub>10</sub> - <i>b</i> -PNAM <sub>10</sub>                                                                                                                                                            | >99                                                  | 7200                                              | 4400                                               | 1.16                   |
| 6     | PNAM <sub>10</sub> - <i>b</i> -PNAM <sub>10</sub>                                                                                                                             | >99                                                  | 8600                                              | 5400                                               | 1.18                   |
| 7     | PNAM <sub>10</sub> - <i>b</i> -PNAM <sub>10</sub>                                                                                              | >99                                                  | 10000                                             | 6600                                               | 1.19                   |
| 8     | PNAM <sub>10</sub> - <i>b</i> -PNAM <sub>10</sub>                                                               | >99                                                  | 11400                                             | 7500                                               | 1.21                   |
| 9     | PNAM <sub>10</sub> - <i>b</i> -PNAM <sub>10</sub>                                | >99                                                  | 12900                                             | 9000                                               | 1.17                   |
| 10    | PNAM <sub>10</sub> - <i>b</i> -PNAM <sub>10</sub> | >99                                                  | 14300                                             | 10100                                              | 1.19                   |

<sup>a</sup> Determined by <sup>1</sup>H NMR using eq. 1. <sup>b</sup> Determined using eq. 2. <sup>c</sup> Determined using THF-SEC

**Table S3** - Conditions used in preparation of (PNAM<sub>10</sub>)<sub>10</sub> via RAFT in H<sub>2</sub>O/dioxane at 70 °C using VA-044 as thermal azoinitiator.

| Block                                                  | 1                     | 2                     | 3                     | 4                     | 5                     | 6                     | 7                     | 8                     | 9                     | 10                    |
|--------------------------------------------------------|-----------------------|-----------------------|-----------------------|-----------------------|-----------------------|-----------------------|-----------------------|-----------------------|-----------------------|-----------------------|
| Monomer                                                | NAM                   |
| DP <sub>targeted</sub>                                 | 10                    | 10                    | 10                    | 10                    | 10                    | 10                    | 10                    | 10                    | 10                    | 10                    |
| m <sub>monomer added</sub> (mg)                        | 400.0                 | 400.0                 | 400.0                 | 400.0                 | 400.0                 | 400.0                 | 400.0                 | 400.0                 | 400.0                 | 400.0                 |
| m <sub>CTA added</sub> (mg)                            | 67.6                  | -                     | -                     | -                     | -                     | -                     | -                     | -                     | -                     | -                     |
| m <sub>VA-044 added</sub> (mg)                         | 0.23                  | 0.12                  | 0.18                  | 0.25                  | 0.31                  | 0.35                  | 0.40                  | 0.44                  | 0.48                  | 0.54                  |
| V <sub>H<sub>2</sub>O added</sub> (mL)                 | 0.470                 | 0.588                 | 0.588                 | 0.588                 | 0.588                 | 0.352                 | 0.352                 | 0.352                 | 0.352                 | 0.352                 |
| V <sub>dioxane added</sub> (mL)                        | 0.118                 | -                     | -                     | -                     | -                     | -                     | -                     | -                     | -                     | -                     |
| % H <sub>2</sub> O                                     | 80.0                  | 90.0                  | 93.3                  | 95.0                  | 96.0                  | 96.4                  | 96.8                  | 97.1                  | 97.3                  | 97.5                  |
| V <sub>total</sub> (mL) <sup>a</sup>                   | 0.994                 | 1.889                 | 2.883                 | 3.778                 | 4.722                 | 5.431                 | 6.139                 | 6.848                 | 7.556                 | 8.265                 |
| m <sub>VA-044total</sub> (mg) <sup>b</sup>             | 0.23                  | 0.13                  | 0.19                  | 0.26                  | 0.32                  | 0.37                  | 0.42                  | 0.46                  | 0.51                  | 0.56                  |
| [Mon] <sub>0</sub> (mol.L <sup>-1</sup> ) <sup>c</sup> | 3.00                  | 1.50                  | 1.00                  | 0.75                  | 0.60                  | 0.52                  | 0.46                  | 0.41                  | 0.37                  | 0.34                  |
| [VA-044] <sub>0</sub> (mol.L <sup>-1</sup> )           | 7.50 10 <sup>-4</sup> | 2.17 10 <sup>-4</sup> | 2.07 10 <sup>-4</sup> | 2.11 10 <sup>-4</sup> | 2.08 10 <sup>-4</sup> | 2.10 10 <sup>-4</sup> | 2.10 10 <sup>-4</sup> | 2.06 10 <sup>-4</sup> | 2.07 10 <sup>-4</sup> | 2.11 10 <sup>-4</sup> |
| [PABTC] <sub>0</sub> /[VA-044] <sub>0</sub>            | 400                   | 691                   | 483                   | 356                   | 288                   | 249                   | 220                   | 201                   | 181                   | 162                   |

<sup>a</sup> Represents the sum of the volume of the monomer added + volume of solvent + V<sub>total</sub> from the previous block. <sup>b</sup> m<sub>VA-044 total</sub> represents the sum of the initiator added m<sub>VA-044 added</sub> + the amount of initiator remaining from the previous block. <sup>c</sup> Represents the concentration of the monomer at the beginning of each block extension.

**Table S4** - Monomer conversion and THF-SEC analysis of (PNAM<sub>10</sub>)<sub>10</sub> prepared *via* RAFT in H<sub>2</sub>O/dioxane at 70 °C using VA-044 as thermal azoinitiator.

| Block | Multiblock poly(4-acryloylmorpholine)<br>composition                                                                                                                                                                                                                                                      | Overall<br>monomer<br>conversion<br>(%) <sup>a</sup> | $M_{n,th}$<br>(g.mol <sup>-1</sup> ) <sup>b</sup> | $M_{n,SEC}$<br>(g.mol <sup>-1</sup> ) <sup>c</sup> | $\bar{D}^c$ |
|-------|-----------------------------------------------------------------------------------------------------------------------------------------------------------------------------------------------------------------------------------------------------------------------------------------------------------|------------------------------------------------------|---------------------------------------------------|----------------------------------------------------|-------------|
| 1     | PNAM <sub>10</sub>                                                                                                                                                                                                                                                                                        | >99                                                  | 1600                                              | 1100                                               | 1.13        |
| 2     | PNAM <sub>10</sub> - <i>b</i> -PNAM <sub>10</sub>                                                                                                                                                                                                                                                         | >99                                                  | 3100                                              | 2100                                               | 1.10        |
| 3     | PNAM <sub>10</sub> - <i>b</i> -PNAM <sub>10</sub> - <i>b</i> -PNAM <sub>10</sub>                                                                                                                                                                                                                          | >99                                                  | 4500                                              | 2900                                               | 1.10        |
| 4     | PNAM <sub>10</sub> - <i>b</i> -PNAM <sub>10</sub> - <i>b</i> -PNAM <sub>10</sub> - <i>b</i> -PNAM <sub>10</sub>                                                                                                                                                                                           | >99                                                  | 5900                                              | 3900                                               | 1.10        |
| 5     | PNAM <sub>10</sub> - <i>b</i> -PNAM <sub>10</sub> - <i>b</i> -PNAM <sub>10</sub> - <i>b</i> -PNAM <sub>10</sub> - <i>b</i> -PNAM <sub>10</sub>                                                                                                                                                            | >99                                                  | 7300                                              | 4800                                               | 1.10        |
| 6     | PNAM <sub>10</sub> - <i>b</i> -PNAM <sub>10</sub>                                                                                                                             | >99                                                  | 8700                                              | 5900                                               | 1.09        |
| 7     | PNAM <sub>10</sub> - <i>b</i> -PNAM <sub>10</sub>                                                                                              | >99                                                  | 10100                                             | 6800                                               | 1.11        |
| 8     | PNAM <sub>10</sub> - <i>b</i> -PNAM <sub>10</sub>                                                               | >99                                                  | 11500                                             | 7400                                               | 1.13        |
| 9     | PNAM <sub>10</sub> - <i>b</i> -PNAM <sub>10</sub>                                | >99                                                  | 12900                                             | 8300                                               | 1.13        |
| 10    | PNAM <sub>10</sub> - <i>b</i> -PNAM <sub>10</sub> | >99                                                  | 14300                                             | 9000                                               | 1.15        |

<sup>a</sup> Determined by <sup>1</sup>H NMR using eq. 1. <sup>b</sup> Determined using eq. 2. <sup>c</sup> Determined using THF-SEC

**Table S5** - Conditions used in preparation of (PHEA<sub>10</sub>)<sub>10</sub> *via* RAFT in H<sub>2</sub>O/dioxane at 25 °C using TBHP/AsAc redox pair as initiator.

| Block                                                   | 1                     | 2                     | 3                     | 4                     | 5                     | 6                     | 7                     | 8                     | 9                     | 10                    |
|---------------------------------------------------------|-----------------------|-----------------------|-----------------------|-----------------------|-----------------------|-----------------------|-----------------------|-----------------------|-----------------------|-----------------------|
| Monomer                                                 | HEA                   |
| DP <sub>targeted</sub>                                  | 10                    | 10                    | 10                    | 10                    | 10                    | 10                    | 10                    | 10                    | 10                    | 10                    |
| m <sub>monomer added</sub> (mg)                         | 303.3                 | 303.3                 | 303.3                 | 303.3                 | 303.3                 | 303.3                 | 303.3                 | 303.3                 | 303.3                 | 303.3                 |
| m <sub>CTA added</sub> (mg)                             | 62.3                  | -                     | -                     | -                     | -                     | -                     | -                     | -                     | -                     | -                     |
| m <sub>TBHP added</sub> (mg)                            | 1.18                  | 0.47                  | 0.59                  | 0.78                  | 0.98                  | 0.94                  | 1.10                  | 1.26                  | 1.41                  | 1.57                  |
| m <sub>AsAc added</sub> (mg)                            | 1.16                  | 0.46                  | 0.58                  | 0.77                  | 0.97                  | 0.93                  | 1.08                  | 1.24                  | 1.39                  | 1.55                  |
| V <sub>H2O added</sub> (mL)                             | 0.399                 | 0.571                 | 0.571                 | 0.571                 | 0.571                 | 0.571                 | 0.571                 | 0.571                 | 0.571                 | 0.571                 |
| V <sub>dioxane added</sub> (mL)                         | 0.171                 | -                     | -                     | -                     | -                     | -                     | -                     | -                     | -                     | -                     |
| % H <sub>2</sub> O                                      | 70.0                  | 85.0                  | 90.0                  | 92.5                  | 94.0                  | 95.0                  | 95.7                  | 96.3                  | 96.7                  | 97.0                  |
| V <sub>total</sub> (mL) <sup>a</sup>                    | 0.871                 | 1.741                 | 2.612                 | 3.483                 | 4.353                 | 5.224                 | 6.095                 | 6.965                 | 7.836                 | 8.707                 |
| [Mon] <sub>0</sub> (mol.L <sup>-1</sup> ) <sup>b</sup>  | 3.00                  | 1.50                  | 1.00                  | 0.75                  | 0.60                  | 0.50                  | 0.43                  | 0.38                  | 0.33                  | 0.30                  |
| [TBHP] <sub>0</sub> (mol.L <sup>-1</sup> ) <sup>c</sup> | 1.50 10 <sup>-2</sup> | 3.00 10 <sup>-3</sup> | 2.50 10 <sup>-3</sup> | 2.50 10 <sup>-3</sup> | 2.50 10 <sup>-3</sup> | 2.00 10 <sup>-3</sup> | 2.50 10 <sup>-3</sup> | 2.50 10 <sup>-3</sup> | 2.50 10 <sup>-3</sup> | 2.50 10 <sup>-3</sup> |
| [AsAc] <sub>0</sub> (mol.L <sup>-1</sup> ) <sup>c</sup> | 7.50 10 <sup>-3</sup> | 1.50 10 <sup>-3</sup> | 1.25 10 <sup>-3</sup> | 1.25 10 <sup>-3</sup> | 1.25 10 <sup>-3</sup> | 1.50 10 <sup>-3</sup> | 1.25 10 <sup>-3</sup> | 1.25 10 <sup>-3</sup> | 1.25 10 <sup>-3</sup> | 1.25 10 <sup>-3</sup> |
| [PABTC] <sub>0</sub> /[TBHP] <sub>0</sub> <sup>d</sup>  | 20                    | 50                    | 40                    | 30                    | 24                    | 25                    | 21                    | 19                    | 17                    | 15                    |

<sup>a</sup> Represents the sum of the volume of the monomer added + volume of solvent + V<sub>total</sub> from the previous block. <sup>b</sup> Represents the concentration of the monomer at the beginning of each block extension. <sup>c</sup> The concentration of TBHP/AsAc at the beginning of each block, assuming full consumption of both TBHP and AsAc in the previous block. <sup>d</sup> The theoretical ratio of PABTC chain transfer agent to TBHP oxidant, assuming full consumption of TBHP in previous block.

**Table S6** - Monomer conversion and DMF-SEC analysis of (PHEA<sub>10</sub>)<sub>10</sub> prepared *via* RAFT in H<sub>2</sub>O/dioxane at 25 °C using TBHP/AsAc redox pair as initiator.

| Block | Multiblock poly(2-hydroxyethyl acrylate) composition                                                                                                                                                                                                                                                      | Overall monomer conversion (%) <sup>a</sup> | $M_{n,th}$ (g.mol <sup>-1</sup> ) <sup>b</sup> | $M_{n,SEC}$ (g.mol <sup>-1</sup> ) <sup>c</sup> | $\bar{D}$ <sup>c</sup> |
|-------|-----------------------------------------------------------------------------------------------------------------------------------------------------------------------------------------------------------------------------------------------------------------------------------------------------------|---------------------------------------------|------------------------------------------------|-------------------------------------------------|------------------------|
| 1     | PHEA <sub>10</sub>                                                                                                                                                                                                                                                                                        | >99                                         | 1400                                           | 3500                                            | 1.21                   |
| 2     | PHEA <sub>10</sub> - <i>b</i> -PHEA <sub>10</sub>                                                                                                                                                                                                                                                         | >99                                         | 2500                                           | 6200                                            | 1.14                   |
| 3     | PHEA <sub>10</sub> - <i>b</i> -PHEA <sub>10</sub> - <i>b</i> -PHEA <sub>10</sub>                                                                                                                                                                                                                          | >99                                         | 3700                                           | 9200                                            | 1.12                   |
| 4     | PHEA <sub>10</sub> - <i>b</i> -PHEA <sub>10</sub> - <i>b</i> -PHEA <sub>10</sub> - <i>b</i> -PHEA <sub>10</sub>                                                                                                                                                                                           | 99                                          | 4800                                           | 12100                                           | 1.13                   |
| 5     | PHEA <sub>10</sub> - <i>b</i> -PHEA <sub>10</sub> - <i>b</i> -PHEA <sub>10</sub> - <i>b</i> -PHEA <sub>10</sub> - <i>b</i> -PHEA <sub>10</sub>                                                                                                                                                            | >99                                         | 6000                                           | 14400                                           | 1.19                   |
| 6     | PHEA <sub>10</sub> - <i>b</i> -PHEA <sub>10</sub>                                                                                                                             | >98                                         | 7100                                           | 17600                                           | 1.22                   |
| 7     | PHEA <sub>10</sub> - <i>b</i> -PHEA <sub>10</sub>                                                                                              | >99                                         | 8300                                           | 19900                                           | 1.27                   |
| 8     | PHEA <sub>10</sub> - <i>b</i> -PHEA <sub>10</sub>                                                               | >99                                         | 9400                                           | 25100                                           | 1.34                   |
| 9     | PHEA <sub>10</sub> - <i>b</i> -PHEA <sub>10</sub>                                | >98                                         | 10500                                          | 29200                                           | 1.25                   |
| 10    | PHEA <sub>10</sub> - <i>b</i> -PHEA <sub>10</sub> | >98                                         | 11600                                          | 32000                                           | 1.33                   |

<sup>a</sup> Determined by <sup>1</sup>H NMR using eq. 1. <sup>b</sup> Determined using eq. 2. <sup>c</sup> Determined using DMF-SEC

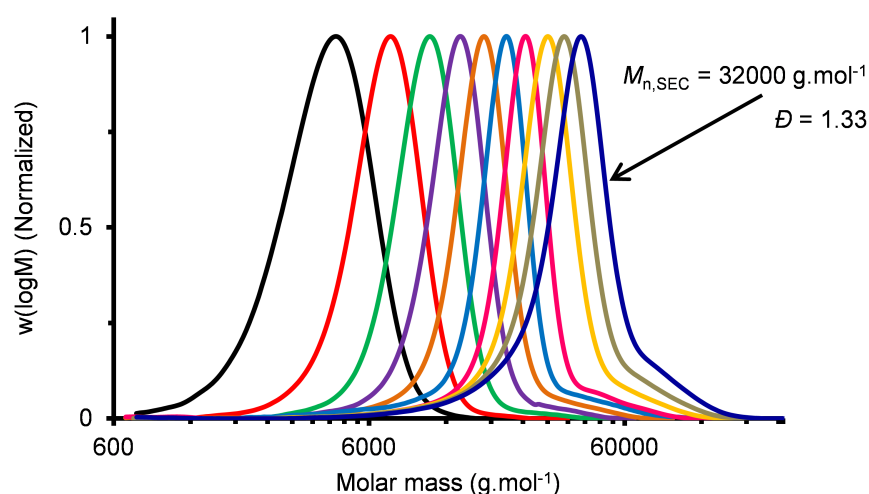

**Figure S5** - DMF-SEC chromatograms for (PHEA<sub>10</sub>)<sub>10</sub> prepared *via* RAFT in H<sub>2</sub>O/dioxane at 25 °C using TBHP/AsAc redox pair as initiator.

**Table S7** - Conditions used in preparation of (PHEA<sub>10</sub>)<sub>10</sub> *via* RAFT in H<sub>2</sub>O/dioxane at 70 °C using VA-044 as thermal azoinitiator.

| Block                                                  | 1                     | 2                     | 3                     | 4                     | 5                     | 6                     | 7                     | 8                     | 9                     | 10                    |
|--------------------------------------------------------|-----------------------|-----------------------|-----------------------|-----------------------|-----------------------|-----------------------|-----------------------|-----------------------|-----------------------|-----------------------|
| Monomer                                                | HEA                   |
| DP <sub>targeted</sub>                                 | 10                    | 10                    | 10                    | 10                    | 10                    | 10                    | 10                    | 10                    | 10                    | 10                    |
| m <sub>monomer added</sub> (mg)                        | 303.0                 | 303.0                 | 303.0                 | 303.0                 | 303.0                 | 303.0                 | 303.0                 | 303.0                 | 303.0                 | 303.0                 |
| m <sub>CTA added</sub> (mg)                            | 62.2                  | -                     | -                     | -                     | -                     | -                     | -                     | -                     | -                     | -                     |
| m <sub>VA-044 added</sub> (mg)                         | 0.84                  | 0.56                  | 0.84                  | 1.12                  | 1.41                  | 1.69                  | 1.97                  | 2.25                  | 2.53                  | 2.81                  |
| V <sub>H2O added</sub> (mL)                            | 0.314                 | 0.570                 | 0.570                 | 0.570                 | 0.570                 | 0.570                 | 0.570                 | 0.570                 | 0.570                 | 0.570                 |
| V <sub>dioxane added</sub> (mL)                        | 0.171                 | -                     | -                     | -                     | -                     | -                     | -                     | -                     | -                     | -                     |
| % H <sub>2</sub> O                                     | 70.0                  | 85.0                  | 90.0                  | 92.5                  | 94.0                  | 95.0                  | 95.7                  | 96.3                  | 96.7                  | 97.0                  |
| V <sub>total</sub> (mL) <sup>a</sup>                   | 0.870                 | 1.740                 | 2.609                 | 3.479                 | 4.349                 | 5.219                 | 6.089                 | 6.958                 | 7.828                 | 8.698                 |
| m <sub>VA-044total</sub> (mg) <sup>b</sup>             | 0.84                  | 0.60                  | 0.87                  | 1.16                  | 1.46                  | 1.76                  | 2.05                  | 2.34                  | 2.64                  | 2.93                  |
| [Mon] <sub>0</sub> (mol.L <sup>-1</sup> ) <sup>c</sup> | 3.00                  | 1.50                  | 1.00                  | 0.75                  | 0.60                  | 0.50                  | 0.43                  | 0.38                  | 0.33                  | 0.30                  |
| [VA-044] <sub>0</sub> (mol.L <sup>-1</sup> )           | 2.99 10 <sup>-3</sup> | 1.06 10 <sup>-3</sup> | 1.03 10 <sup>-3</sup> | 1.03 10 <sup>-3</sup> | 1.04 10 <sup>-3</sup> |
| [PABTC] <sub>0</sub> /[VA-044] <sub>0</sub>            | 101                   | 141                   | 97                    | 73                    | 58                    | 48                    | 41                    | 37                    | 32                    | 29                    |

<sup>a</sup> Represents the sum of the volume of the monomer added + volume of solvent + V<sub>total</sub> from the previous block. <sup>b</sup> m<sub>VA-044 total</sub> represents the sum of the initiator added m<sub>VA-044 added</sub> + the amount of initiator remaining from the previous block. <sup>c</sup> Represents the concentration of the monomer at the beginning of each block extension.

**Table S8** - Monomer conversion and DMF-SEC analysis of (PHEA<sub>10</sub>)<sub>10</sub> prepared *via* RAFT in H<sub>2</sub>O/dioxane at 70 °C using VA-044 as thermal azoinitiator.

[illegible]

<sup>a</sup> Determined by <sup>1</sup>H NMR using eq. 1. <sup>b</sup> Determined using eq. 2. <sup>c</sup> Determined using DMF-SEC



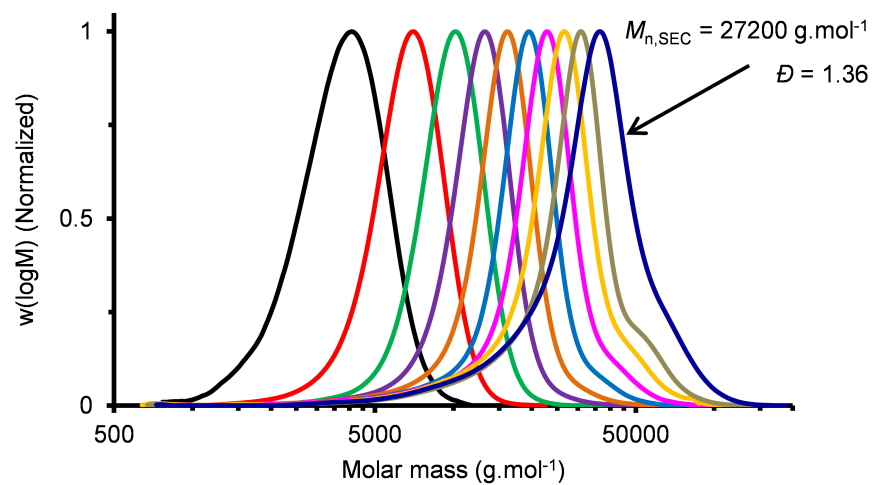

**Figure S6** - DMF-SEC chromatograms for (PHEA<sub>10</sub>)<sub>10</sub> prepared *via* RAFT in H<sub>2</sub>O/dioxane at 70 °C using VA-044 as thermal azoinitiator.

**Table S9** - Conditions used in preparation of P(NAM<sub>100</sub>)<sub>6</sub> *via* RAFT in H<sub>2</sub>O/dioxane at 25 °C using TBHP/AsAc redox pair as initiator.

| Block                                                   | 1                     | 2                     | 3                     | 4                     | 5                     | 6                     |
|---------------------------------------------------------|-----------------------|-----------------------|-----------------------|-----------------------|-----------------------|-----------------------|
| Monomer                                                 | NAM                   | NAM                   | NAM                   | NAM                   | NAM                   | NAM                   |
| DP <sub>targeted</sub>                                  | 100                   | 100                   | 100                   | 100                   | 100                   | 100                   |
| m <sub>monomer added</sub> (g)                          | 1.00                  | 1.00                  | 1.00                  | 1.00                  | 1.00                  | 1.00                  |
| m <sub>CTA added</sub> (mg)                             | 168.9                 | -                     | -                     | -                     | -                     | -                     |
| m <sub>TBHP added</sub> (mg)                            | 0.21                  | 0.32                  | 0.60                  | 0.85                  | 0.94                  | 1.20                  |
| m <sub>AsAc added</sub> (mg)                            | 0.21                  | 0.31                  | 0.58                  | 0.83                  | 0.92                  | 1.18                  |
| V <sub>H<sub>2</sub>O added</sub> (mL)                  | 1.323                 | 1.470                 | 1.470                 | 2.651                 | 1.470                 | 2.651                 |
| V <sub>dioxane added</sub> (mL)                         | 0.147                 | -                     | -                     | -                     | -                     | -                     |
| % H <sub>2</sub> O                                      | 90.0                  | 95.0                  | 96.7                  | 97.9                  | 98.3                  | 98.7                  |
| V <sub>total</sub> (mL) <sup>a</sup>                    | 2.361                 | 4.722                 | 7.084                 | 10.625                | 12.987                | 16.528                |
| [Mon] <sub>0</sub> (mol.L <sup>-1</sup> ) <sup>b</sup>  | 3.00                  | 1.50                  | 1.00                  | 0.67                  | 0.55                  | 0.43                  |
| [TBHP] <sub>0</sub> (mol.L <sup>-1</sup> ) <sup>c</sup> | 1.00 10 <sup>-3</sup> | 7.50 10 <sup>-4</sup> | 9.35 10 <sup>-4</sup> | 8.89 10 <sup>-4</sup> | 8.02 10 <sup>-4</sup> | 8.09 10 <sup>-4</sup> |
| [AsAc] <sub>0</sub> (mol.L <sup>-1</sup> ) <sup>c</sup> | 5.00 10 <sup>-4</sup> | 3.75 10 <sup>-4</sup> | 4.68 10 <sup>-4</sup> | 4.45 10 <sup>-4</sup> | 4.01 10 <sup>-4</sup> | 4.05 10 <sup>-4</sup> |
| [PABTC] <sub>0</sub> /[TBHP] <sub>0</sub> <sup>d</sup>  | 30                    | 20                    | 11                    | 7                     | 7                     | 5                     |

<sup>a</sup> Represents the sum of the volume of the monomer added + volume of solvent + V<sub>total</sub> from the previous block. <sup>b</sup> Represents the concentration of the monomer at the beginning of each block extension. <sup>c</sup> The concentration of TBHP/AsAc at the beginning of each block, assuming full consumption of both TBHP and AsAc in the previous block. <sup>d</sup> The theoretical ratio of PABTC chain transfer agent to TBHP oxidant, assuming full consumption of TBHP in previous block.

**Table S10** - Monomer conversion and DMF-SEC analysis of (PNAM<sub>100</sub>)<sub>6</sub> prepared *via* RAFT in H<sub>2</sub>O/dioxane at 25 °C using TBHP/AsAc redox pair as initiator.

| Block | Multiblock poly(4-acryloylmorpholine)<br>composition                                                                                                                                | Overall<br>monomer<br>conversion (%) <sup>a</sup> | $M_{n,th}$<br>(g.mol <sup>-1</sup> ) <sup>b</sup> | $M_{n,SEC}$<br>(g.mol <sup>-1</sup> ) <sup>c</sup> | $\bar{D}^c$ |
|-------|-------------------------------------------------------------------------------------------------------------------------------------------------------------------------------------|---------------------------------------------------|---------------------------------------------------|----------------------------------------------------|-------------|
| 1     | PNAM <sub>100</sub>                                                                                                                                                                 | 97                                                | 13900                                             | 13100                                              | 1.07        |
| 2     | PNAM <sub>100</sub> - <i>b</i> -PNAM <sub>100</sub>                                                                                                                                 | >99                                               | 28000                                             | 37700                                              | 1.07        |
| 3     | PNAM <sub>100</sub> - <i>b</i> -PNAM <sub>100</sub> - <i>b</i> -PNAM <sub>100</sub>                                                                                                 | >99                                               | 42200                                             | 43700                                              | 1.09        |
| 4     | PNAM <sub>100</sub> - <i>b</i> -PNAM <sub>100</sub> - <i>b</i> -PNAM <sub>100</sub> - <i>b</i> -PNAM <sub>100</sub>                                                                 | >99                                               | 56300                                             | 59400                                              | 1.13        |
| 5     | PNAM <sub>100</sub> - <i>b</i> -PNAM <sub>100</sub> - <i>b</i> -PNAM <sub>100</sub> - <i>b</i> -PNAM <sub>100</sub> - <i>b</i> -PNAM <sub>100</sub>                                 | >99                                               | 70400                                             | 73200                                              | 1.21        |
| 6     | PNAM <sub>100</sub> - <i>b</i> -PNAM <sub>100</sub> | >99                                               | 84500                                             | 84700                                              | 1.31        |

<sup>a</sup> Determined by <sup>1</sup>H NMR using eq. 1. <sup>b</sup> Determined using eq. 2. <sup>c</sup> Determined using DMF-SEC

**Table S11** - Conditions used in preparation of (PHEA<sub>100</sub>)<sub>4</sub> via RAFT in H<sub>2</sub>O/dioxane at 25 °C using TBHP/AsAc redox pair as initiator.

| Block                                                   | 1                     | 2                     | 3                     | 4                     |
|---------------------------------------------------------|-----------------------|-----------------------|-----------------------|-----------------------|
| Monomer                                                 | HEA                   | HEA                   | HEA                   | HEA                   |
| DP <sub>targeted</sub>                                  | 100                   | 100                   | 100                   | 100                   |
| m <sub>monomer added</sub> (mg)                         | 400.0                 | 400.0                 | 400.0                 | 400.0                 |
| m <sub>CTA added</sub> (mg)                             | 8.0                   | -                     | -                     | -                     |
| m <sub>TBHP added</sub> (mg)                            | 0.45                  | 0.30                  | 0.45                  | 0.60                  |
| m <sub>AsAc added</sub> (mg)                            | 0.45                  | 0.30                  | 0.45                  | 0.59                  |
| V <sub>H<sub>2</sub>O added</sub> (mL)                  | 0.890                 | 1.272                 | 1.272                 | 1.272                 |
| V <sub>dioxane added</sub> (mL)                         | 0.382                 | -                     | -                     | -                     |
| % H <sub>2</sub> O                                      | 70.0                  | 85.0                  | 90.0                  | 92.5                  |
| V <sub>total</sub> (mL) <sup>a</sup>                    | 1.672                 | 3.343                 | 5.015                 | 6.687                 |
| [Mon] <sub>0</sub> (mol.L <sup>-1</sup> ) <sup>b</sup>  | 2.00                  | 1.00                  | 0.67                  | 0.50                  |
| [TBHP] <sub>0</sub> (mol.L <sup>-1</sup> ) <sup>c</sup> | 3.00 10 <sup>-3</sup> | 1.00 10 <sup>-3</sup> | 1.00 10 <sup>-3</sup> | 1.00 10 <sup>-4</sup> |
| [AsAc] <sub>0</sub> (mol.L <sup>-1</sup> ) <sup>c</sup> | 1.50 10 <sup>-3</sup> | 5.00 10 <sup>-4</sup> | 5.00 10 <sup>-4</sup> | 5.00 10 <sup>-5</sup> |
| [PABTC] <sub>0</sub> /[TBHP] <sub>0</sub> <sup>d</sup>  | 6.7                   | 10.0                  | 6.7                   | 5.0                   |

<sup>a</sup> Represents the sum of the volume of the monomer added + volume of solvent + V<sub>total</sub> from the previous block. <sup>b</sup> Represents the concentration of the monomer at the beginning of each block extension. <sup>c</sup> The concentration of TBHP/AsAc at the beginning of each block, assuming full consumption of both TBHP and AsAc in the previous block. <sup>d</sup> The theoretical ratio of PABTC chain transfer agent to TBHP oxidant, assuming full consumption of TBHP in previous block.

**Table S12** - Monomer conversion and DMF-SEC analysis of (PHEA<sub>100</sub>)<sub>4</sub> prepared *via* RAFT in H<sub>2</sub>O/dioxane at 25 °C using TBHP/AsAc redox pair as initiator.

| Block | Multiblock poly(2-hydroxyethyl acrylate)<br>composition                                                             | Overall<br>monomer<br>conversion<br>(%) <sup>a</sup> | $M_{n,th}$<br>(g.mol <sup>-1</sup> ) <sup>b</sup> | $M_{n,SEC}$<br>(g.mol <sup>-1</sup> ) <sup>c</sup> | $\bar{D}^c$ |
|-------|---------------------------------------------------------------------------------------------------------------------|------------------------------------------------------|---------------------------------------------------|----------------------------------------------------|-------------|
| 1     | PHEA <sub>100</sub>                                                                                                 | >99                                                  | 11800                                             | 22200                                              | 1.11        |
| 2     | PHEA <sub>100</sub> - <i>b</i> -PHEA <sub>100</sub>                                                                 | >99                                                  | 23200                                             | 50900                                              | 1.13        |
| 3     | PHEA <sub>100</sub> - <i>b</i> -PHEA <sub>100</sub> - <i>b</i> -PHEA <sub>100</sub>                                 | >99                                                  | 35100                                             | 67300                                              | 1.21        |
| 4     | PHEA <sub>100</sub> - <i>b</i> -PHEA <sub>100</sub> - <i>b</i> -PHEA <sub>100</sub> - <i>b</i> -PHEA <sub>100</sub> | >99                                                  | 46700                                             | 80600                                              | 1.50        |

<sup>a</sup> Determined by <sup>1</sup>H NMR using eq. 1. <sup>b</sup> Determined using eq. 2. <sup>c</sup> Determined using DMF-SEC

**Table S13** - Conditions used in preparation of the low DP acrylamido heptablock copolymer via RAFT in H<sub>2</sub>O/dioxane at 25 °C using TBHP/AsAc redox pair as initiator.

| Block                                                   | 1                     | 2                     | 3                     | 4                     | 5                     | 6                     | 7                     |
|---------------------------------------------------------|-----------------------|-----------------------|-----------------------|-----------------------|-----------------------|-----------------------|-----------------------|
| Monomer                                                 | NAM                   | NIPAM                 | NAM                   | DMA                   | NAM                   | DEA                   | NAM                   |
| DP <sub>targeted</sub>                                  | 10                    | 10                    | 10                    | 10                    | 10                    | 10                    | 10                    |
| m <sub>monomer added</sub> (mg)                         | 600.0                 | 481.0                 | 600.0                 | 421.0                 | 600.0                 | 540.6                 | 600.0                 |
| m <sub>CTA added</sub> (mg)                             | 101.3                 | -                     | -                     | -                     | -                     | -                     | -                     |
| m <sub>TBHP added</sub> (mg)                            | 0.77                  | 0.77                  | 0.38                  | 0.64                  | 0.59                  | 2.25                  | 0.77                  |
| m <sub>AsAc added</sub> (mg)                            | 0.75                  | 0.75                  | 0.37                  | 0.62                  | 0.58                  | 2.20                  | 0.75                  |
| V <sub>H<sub>2</sub>O added</sub> (mL)                  | 0.617                 | 1.417                 | 0.882                 | 0.979                 | 0.882                 | 0.806                 | 0.882                 |
| V <sub>dioxane added</sub> (mL)                         | 0.265                 | -                     | -                     | -                     | -                     | -                     | -                     |
| % H <sub>2</sub> O                                      | 70.0                  | 88.5                  | 91.7                  | 93.6                  | 94.7                  | 95.5                  | 96.1                  |
| V <sub>total</sub> (mL) <sup>a</sup>                    | 1.417                 | 2.883                 | 4.250                 | 5.666                 | 7.083                 | 8.500                 | 9.917                 |
| [Mon] <sub>0</sub> (mol.L <sup>-1</sup> ) <sup>b</sup>  | 3.00                  | 1.50                  | 1.00                  | 0.75                  | 0.60                  | 0.50                  | 0.43                  |
| [TBHP] <sub>0</sub> (mol.L <sup>-1</sup> ) <sup>c</sup> | 6.00 10 <sup>-3</sup> | 2.93 10 <sup>-3</sup> | 9.76 10 <sup>-4</sup> | 1.22 10 <sup>-3</sup> | 9.02 10 <sup>-4</sup> | 2.87 10 <sup>-3</sup> | 8.38 10 <sup>-4</sup> |
| [AsAc] <sub>0</sub> (mol.L <sup>-1</sup> ) <sup>c</sup> | 3.00 10 <sup>-3</sup> | 1.47 10 <sup>-3</sup> | 4.88 10 <sup>-4</sup> | 6.10 10 <sup>-4</sup> | 4.51 10 <sup>-4</sup> | 1.44 10 <sup>-8</sup> | 4.19 10 <sup>-4</sup> |
| [PABTC] <sub>0</sub> /[TBHP] <sub>0</sub> <sup>d</sup>  | 50                    | 51                    | 102                   | 61                    | 67                    | 17                    | 51                    |

<sup>a</sup> Represents the sum of the volume of the monomer added + volume of solvent + V<sub>total</sub> from the previous block. <sup>b</sup> Represents the concentration of the monomer at the beginning of each block extension. <sup>c</sup> The concentration of TBHP/AsAc at the beginning of each block, assuming full consumption of both TBHP and AsAc in the previous block. <sup>d</sup> The theoretical ratio of PABTC chain transfer agent to TBHP oxidant, assuming full consumption of TBHP in previous block.

**Table S14** - Monomer conversion and DMF-SEC analysis of the low DP acrylamido heptablock copolymer prepared *via* RAFT in H<sub>2</sub>O/dioxane at 25 °C using TBHP/AsAc redox pair as initiator.

| Block | Multiblock copolymer composition                                                                                                                                                                               | Overall monomer conversion (%) <sup>a</sup> | $M_{n,th}$ (g.mol <sup>-1</sup> ) <sup>b</sup> | $M_{n,SEC}$ (g.mol <sup>-1</sup> ) <sup>c</sup> | $\bar{D}^c$ |
|-------|----------------------------------------------------------------------------------------------------------------------------------------------------------------------------------------------------------------|---------------------------------------------|------------------------------------------------|-------------------------------------------------|-------------|
| 1     | PNAM <sub>10</sub>                                                                                                                                                                                             | 99                                          | 1600                                           | 1100                                            | 1.13        |
| 2     | PNAM <sub>10</sub> - <i>b</i> -PNIPAM <sub>10</sub>                                                                                                                                                            | 99                                          | 2800                                           | 2800                                            | 1.13        |
| 3     | PNAM <sub>10</sub> - <i>b</i> -PNIPAM <sub>10</sub> - <i>b</i> -PNAM <sub>10</sub>                                                                                                                             | 99                                          | 4200                                           | 4400                                            | 1.13        |
| 4     | PNAM <sub>10</sub> - <i>b</i> -PNIPAM <sub>10</sub> - <i>b</i> -PNAM <sub>10</sub> - <i>b</i> -PDMA <sub>10</sub>                                                                                              | 99                                          | 5100                                           | 6200                                            | 1.11        |
| 5     | PNAM <sub>10</sub> - <i>b</i> -PNIPAM <sub>10</sub> - <i>b</i> -PNAM <sub>10</sub> - <i>b</i> -PDMA <sub>10</sub> - <i>b</i> -PNAM <sub>10</sub>                                                               | >99                                         | 6500                                           | 7900                                            | 1.09        |
| 6     | PNAM <sub>10</sub> - <i>b</i> -PNIPAM <sub>10</sub> - <i>b</i> -PNAM <sub>10</sub> - <i>b</i> -PDMA <sub>10</sub> - <i>b</i> -PNAM <sub>10</sub> - <i>b</i> -PDEA <sub>10</sub>                                | >99                                         | 7800                                           | 9400                                            | 1.12        |
| 7     | PNAM <sub>10</sub> - <i>b</i> -PNIPAM <sub>10</sub> - <i>b</i> -PNAM <sub>10</sub> - <i>b</i> -PDMA <sub>10</sub> - <i>b</i> -PNAM <sub>10</sub> - <i>b</i> -PDEA <sub>10</sub> - <i>b</i> -PNAM <sub>10</sub> | >99                                         | 9200                                           | 11200                                           | 1.15        |

<sup>a</sup> Determined by <sup>1</sup>H NMR using eq. 1. <sup>b</sup> Determined using eq. 2. <sup>c</sup> Determined using DMF-SEC

**Table S15** - Conditions used in preparation of the high DP acrylamido pentablock copolymer via RAFT in H<sub>2</sub>O/dioxane at 25 °C using TBHP/AsAc redox pair as initiator.

| Block                                                   | 1                     | 2                     | 3                     | 4                     | 5                     |
|---------------------------------------------------------|-----------------------|-----------------------|-----------------------|-----------------------|-----------------------|
| Monomer                                                 | NAM                   | DMA                   | NIPAM                 | DEA                   | NAM                   |
| DP <sub>targeted</sub>                                  | 100                   | 100                   | 100                   | 100                   | 100                   |
| m <sub>monomer added</sub> (mg)                         | 600.0                 | 421.3                 | 481.0                 | 541.0                 | 600.0                 |
| m <sub>CTA added</sub> (mg)                             | 10.1                  | -                     | -                     | -                     | -                     |
| m <sub>TBHP added</sub> (mg)                            | 0.13                  | 0.26                  | 0.36                  | 0.64                  | 0.66                  |
| m <sub>AsAc added</sub> (mg)                            | 0.06                  | 0.25                  | 0.35                  | 0.62                  | 0.65                  |
| V <sub>H<sub>2</sub>O added</sub> (mL)                  | 0.794                 | 0.979                 | 2.125                 | 0.806                 | 1.590                 |
| V <sub>dioxane added</sub> (mL)                         | 0.088                 | -                     | -                     | -                     | -                     |
| % H <sub>2</sub> O                                      | 90.0                  | 95.3                  | 97.8                  | 98.2                  | 98.6                  |
| V <sub>total</sub> (mL) <sup>a</sup>                    | 1.417                 | 2.833                 | 4.958                 | 6.375                 | 8.500                 |
| [Mon] <sub>0</sub> (mol.L <sup>-1</sup> ) <sup>b</sup>  | 3.00                  | 1.31                  | 0.69                  | 0.86                  | 0.50                  |
| [TBHP] <sub>0</sub> (mol.L <sup>-1</sup> ) <sup>c</sup> | 1.00 10 <sup>-3</sup> | 1.00 10 <sup>-3</sup> | 8.01 10 <sup>-4</sup> | 1.11 10 <sup>-3</sup> | 8.62 10 <sup>-4</sup> |
| [AsAc] <sub>0</sub> (mol.L <sup>-1</sup> ) <sup>c</sup> | 2.50 10 <sup>-4</sup> | 5.00 10 <sup>-4</sup> | 4.00 10 <sup>-4</sup> | 5.55 10 <sup>-4</sup> | 4.31 10 <sup>-4</sup> |
| [PABTC] <sub>0</sub> /[TBHP] <sub>0</sub> <sup>d</sup>  | 30.0                  | 15.0                  | 11.0                  | 6.0                   | 6.0                   |

<sup>a</sup> Represents the sum of the volume of the monomer added + volume of solvent + V<sub>total</sub> from the previous block. <sup>b</sup> Represents the concentration of the monomer at the beginning of each block extension. <sup>c</sup> The concentration of TBHP/AsAc at the beginning of each block, assuming full consumption of both TBHP and AsAc in the previous block. <sup>d</sup> The theoretical ratio of PABTC chain transfer agent to TBHP oxidant, assuming full consumption of TBHP in previous block.



**Table S16** - Monomer conversion and DMF-SEC analysis of the high DP acrylamido pentablock copolymer prepared *via* RAFT in H<sub>2</sub>O/dioxane at 25 °C using TBHP/AsAc redox pair as initiator.

| Block | Multiblock copolymer composition                                                                                                                      | Overall monomer conversion (%) <sup>a</sup> | $M_{n,th}$ (g.mol <sup>-1</sup> ) <sup>b</sup> | $M_{n,SEC}$ (g.mol <sup>-1</sup> ) <sup>c</sup> | $\bar{D}$ <sup>c</sup> |
|-------|-------------------------------------------------------------------------------------------------------------------------------------------------------|---------------------------------------------|------------------------------------------------|-------------------------------------------------|------------------------|
| 1     | PNAM <sub>100</sub>                                                                                                                                   | >99                                         | 14400                                          | 13100                                           | 1.07                   |
| 2     | PNAM <sub>100</sub> - <i>b</i> -PDMA <sub>100</sub>                                                                                                   | >99                                         | 23000                                          | 27600                                           | 1.10                   |
| 3     | PNAM <sub>100</sub> - <i>b</i> -PDMA <sub>100</sub> - <i>b</i> -PNIPAM <sub>100</sub>                                                                 | >99                                         | 32100                                          | 47300                                           | 1.16                   |
| 4     | PNAM <sub>100</sub> - <i>b</i> -PDMA <sub>100</sub> - <i>b</i> -PNIPAM <sub>100</sub> - <i>b</i> -PDEA <sub>100</sub>                                 | >99                                         | 48400                                          | 62700                                           | 1.24                   |
| 5     | PNAM <sub>100</sub> - <i>b</i> -PDMA <sub>100</sub> - <i>b</i> -PNIPAM <sub>100</sub> - <i>b</i> -PDEA <sub>100</sub> - <i>b</i> -PNAM <sub>100</sub> | >99                                         | 62500                                          | 78300                                           | 1.30                   |

<sup>a</sup> Determined by <sup>1</sup>H NMR using eq. 1. <sup>b</sup> Determined using eq. 2. <sup>c</sup> Determined using DMF-SEC

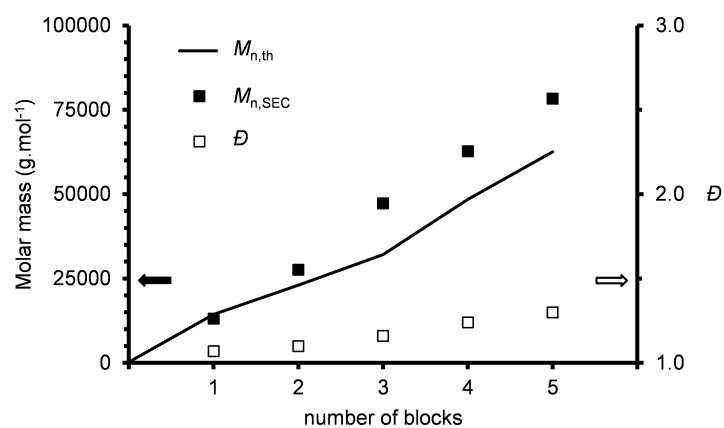

**Figure S7** - Evolution of molar mass and dispersity values (determined by DMF-SEC) with each block extension for the high DP acrylamido pentablock copolymer prepared *via* RAFT in H<sub>2</sub>O/dioxane at 25 °C using TBHP/AsAc redox pair as initiator.

**Table S17** - Conditions used in preparation of the low DP acrylate heptablock copolymer *via* RAFT in H<sub>2</sub>O/dioxane at 25 °C using TBHP/AsAc redox pair as initiator.

| Block                                                   | 1                     | 2                     | 3                     | 4                     | 5                     | 6                     | 7                     |
|---------------------------------------------------------|-----------------------|-----------------------|-----------------------|-----------------------|-----------------------|-----------------------|-----------------------|
| Monomer                                                 | HEA                   | PAGA                  | CEA                   | EGMEA                 | HEA                   | PAGA                  | EGMEA                 |
| DP <sub>targeted</sub>                                  | 10                    | 5                     | 10                    | 10                    | 10                    | 5                     | 10                    |
| m <sub>monomer added</sub> (mg)                         | 303.3                 | 626.9                 | 376.5                 | 339.9                 | 303.3                 | 626.9                 | 339.9                 |
| m <sub>CTA added</sub> (mg)                             | 62.3                  | -                     | -                     | -                     | -                     | -                     | -                     |
| m <sub>TBHP added</sub> (mg)                            | 1.18                  | 0.28                  | 3.24                  | 0.88                  | 0.93                  | 0.68                  | 1.32                  |
| m <sub>AsAc added</sub> (mg)                            | 1.16                  | 0.27                  | 3.2                   | 0.87                  | 0.92                  | 0.67                  | 1.31                  |
| V <sub>H<sub>2</sub>O added</sub> (mL)                  | 0.399                 | 0.078                 | 0.561                 | 0.534                 | 0.571                 | 0.296                 | 0.534                 |
| V <sub>dioxane added</sub> (mL)                         | 0.171                 | -                     | -                     | -                     | -                     | -                     | -                     |
| % H <sub>2</sub> O                                      | 70.0                  | 73.6                  | 85.8                  | 90.2                  | 92.6                  | 93.4                  | 94.6                  |
| V <sub>total</sub> (mL) <sup>a</sup>                    | 0.871                 | 1.524                 | 2.394                 | 3.265                 | 4.136                 | 5.006                 | 5.877                 |
| [Mon] <sub>0</sub> (mol.L <sup>-1</sup> ) <sup>b</sup>  | 3.00                  | 0.86                  | 1.09                  | 0.80                  | 0.63                  | 0.26                  | 0.44                  |
| [TBHP] <sub>0</sub> (mol.L <sup>-1</sup> ) <sup>c</sup> | 1.50 10 <sup>-2</sup> | 2.00 10 <sup>-3</sup> | 1.50 10 <sup>-2</sup> | 3.00 10 <sup>-3</sup> | 2.50 10 <sup>-3</sup> | 1.50 10 <sup>-3</sup> | 2.50 10 <sup>-3</sup> |
| [AsAc] <sub>0</sub> (mol.L <sup>-1</sup> ) <sup>c</sup> | 7.50 10 <sup>-3</sup> | 1.00 10 <sup>-3</sup> | 7.50 10 <sup>-3</sup> | 1.50 10 <sup>-3</sup> | 1.25 10 <sup>-3</sup> | 7.50 10 <sup>-4</sup> | 1.25 10 <sup>-3</sup> |
| [PABTC] <sub>0</sub> /[TBHP] <sub>0</sub> <sup>d</sup>  | 20.0                  | 85.7                  | 7.3                   | 26.7                  | 25.3                  | 34.8                  | 17.8                  |

<sup>a</sup> Represents the sum of the volume of the monomer added + volume of solvent + V<sub>total</sub> from the previous block. <sup>b</sup> Represents the concentration of the monomer at the beginning of each block extension. <sup>c</sup> The concentration of TBHP/AsAc at the beginning of each block, assuming full consumption of both TBHP and AsAc in the previous block. <sup>d</sup> The theoretical ratio of PABTC chain transfer agent to TBHP oxidant, assuming full consumption of TBHP in previous block.

**Table S18** - Monomer conversion and DMF-SEC analysis of the low DP acrylate heptablock copolymer prepared *via* RAFT in H<sub>2</sub>O/dioxane at 25 °C using TBHP/AsAc redox pair as initiator.

| Block | Multiblock copolymer composition                                                                                                                                                                                 | Overall monomer conversion (%) <sup>a</sup> | $M_{n,th}$ (g.mol <sup>-1</sup> ) <sup>b</sup> | $M_{n,SEC}$ (g.mol <sup>-1</sup> ) <sup>c</sup> | $\bar{D}^c$ |
|-------|------------------------------------------------------------------------------------------------------------------------------------------------------------------------------------------------------------------|---------------------------------------------|------------------------------------------------|-------------------------------------------------|-------------|
| 1     | PHEA <sub>10</sub>                                                                                                                                                                                               | >99                                         | 1400                                           | 3300                                            | 1.19        |
| 2     | PHEA <sub>10</sub> - <i>b</i> -PPEGA <sub>5</sub>                                                                                                                                                                | >99                                         | 3800                                           | 5800                                            | 1.17        |
| 3     | PHEA <sub>10</sub> - <i>b</i> -PPEGA <sub>5</sub> - <i>b</i> -PCEA <sub>10</sub>                                                                                                                                 | >99                                         | 5200                                           | 7700                                            | 1.15        |
| 4     | PHEA <sub>10</sub> - <i>b</i> -PPEGA <sub>5</sub> - <i>b</i> -PCEA <sub>10</sub> - <i>b</i> -PEGMEA <sub>10</sub>                                                                                                | >98                                         | 6500                                           | 10000                                           | 1.20        |
| 5     | PHEA <sub>10</sub> - <i>b</i> -PPEGA <sub>5</sub> - <i>b</i> -PCEA <sub>10</sub> - <i>b</i> -PEGMEA <sub>10</sub> - <i>b</i> -PHEA <sub>10</sub>                                                                 | >98                                         | 7600                                           | 13400                                           | 1.18        |
| 6     | PHEA <sub>10</sub> - <i>b</i> -PPEGA <sub>5</sub> - <i>b</i> -PCEA <sub>10</sub> - <i>b</i> -PEGMEA <sub>10</sub> - <i>b</i> -PHEA <sub>10</sub> - <i>b</i> -PPEGA <sub>5</sub>                                  | >98                                         | 10000                                          | 16700                                           | 1.23        |
| 7     | PHEA <sub>10</sub> - <i>b</i> -PPEGA <sub>5</sub> - <i>b</i> -PCEA <sub>10</sub> - <i>b</i> -PEGMEA <sub>10</sub> - <i>b</i> -PHEA <sub>10</sub> - <i>b</i> -PPEGA <sub>5</sub> - <i>b</i> -PEGMEA <sub>10</sub> | >98                                         | 11200                                          | 18400                                           | 1.28        |

<sup>a</sup> Determined by <sup>1</sup>H NMR using eq. 1. <sup>b</sup> Determined using eq. 2. <sup>c</sup> Determined using DMF-SEC

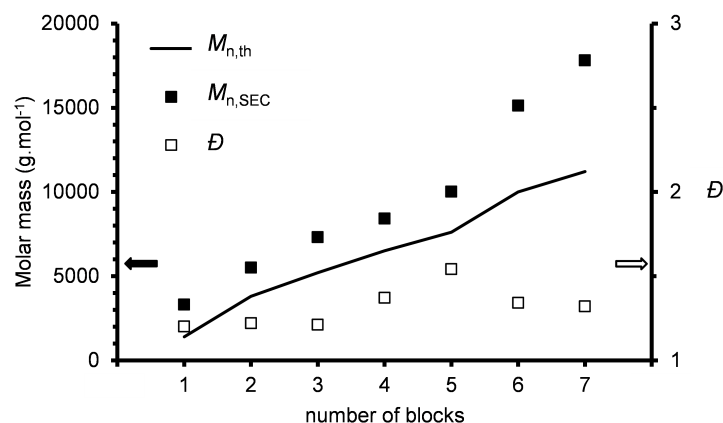

**Figure S8** - Evolution of molar mass and dispersity values (determined by DMF-SEC) with each block extension for the low DP acrylate heptablock copolymer prepared *via* RAFT in H<sub>2</sub>O/dioxane at 25 °C using TBHP/AsAc redox pair as initiator.

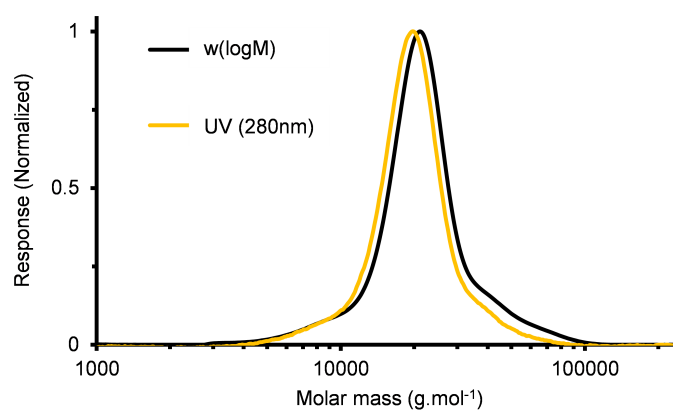

**Figure S9** - DMF-SEC chromatogram of the low DP acrylate heptablock copolymer prepared *via* RAFT in H<sub>2</sub>O/dioxane at 25 °C using TBHP/AsAc redox pair as initiator, showing the (normalized)  $w(\log M)$  and 280 nm UV detector responses.

**Table S19** - Conditions used in preparation of the low DP acrylate octablock copolymer (blocks 1-4, 5b-8b) and the low DP acrylate/acrylamido heptablock copolymer (1-4, 5a-7a) *via* RAFT in H<sub>2</sub>O/dioxane at 25 °C using TBHP/AsAc redox pair as initiator. The polymerization mixture was split into two after the first 4 blocks and each half was block extended to prepare the two different multiblock copolymers.

| Block                                                   | 1                     | 2                     | 3                     | 4                     | 5a                    | 6a                    | 7a                    | 5b                    | 6b                    | 7b                    | 8b                    |
|---------------------------------------------------------|-----------------------|-----------------------|-----------------------|-----------------------|-----------------------|-----------------------|-----------------------|-----------------------|-----------------------|-----------------------|-----------------------|
| Monomer                                                 | HEA                   | AA                    | PAGA                  | MA                    | NAM                   | NIPAM                 | DMA                   | HEA                   | EGMEA                 | PAGA                  | HEA                   |
| DP <sub>targeted</sub>                                  | 10                    | 10                    | 5                     | 10                    | 10                    | 10                    | 10                    | 10                    | 10                    | 5                     | 10                    |
| m <sub>monomer added</sub> (mg)                         | 303.3                 | 188.2                 | 626.9                 | 224.9                 | 184.4                 | 147.8                 | 129.5                 | 151.7                 | 170.0                 | 313.4                 | 151.7                 |
| m <sub>CTA added</sub> (mg)                             | 62.3                  | -                     | -                     | -                     | -                     | -                     | -                     | -                     | -                     | -                     | -                     |
| m <sub>TBHP added</sub> (mg)                            | 1.18                  | 2.91                  | 0.42                  | 0.97                  | 0.45                  | 0.76                  | 0.77                  | 0.45                  | 0.54                  | 0.39                  | 0.61                  |
| m <sub>AsAc added</sub> (mg)                            | 1.16                  | 2.88                  | 0.42                  | 0.96                  | 0.44                  | 0.75                  | 0.76                  | 0.44                  | 0.54                  | 0.38                  | 0.60                  |
| V <sub>H<sub>2</sub>O added</sub> (mL)                  | 0.399                 | 0.567                 | 0.150                 | 0.511                 | 0.271                 | 0.435                 | 0.301                 | 0.285                 | 0.267                 | 0.148                 | 0.372                 |
| V <sub>dioxane added</sub> (mL)                         | 0.171                 | -                     | -                     | -                     | -                     | -                     | -                     | -                     | -                     | -                     | -                     |
| % H <sub>2</sub> O                                      | 70.0                  | 85.0                  | 86.7                  | 90.5                  | 92.7                  | 94.7                  | 95.5                  | 92.8                  | 94.1                  | 94.7                  | 95.7                  |
| V <sub>total</sub> (mL) <sup>a</sup>                    | 0.871                 | 1.138                 | 1.863                 | 2.610                 | 1.740                 | 2.175                 | 2.611                 | 1.74                  | 2.175                 | 2.323                 | 2.696                 |
| [Mon] <sub>0</sub> (mol.L <sup>-1</sup> ) <sup>b</sup>  | 3.00                  | 1.62                  | 0.56                  | 0.85                  | 0.66                  | 0.54                  | 0.46                  | 0.66                  | 0.54                  | 0.23                  | 0.39                  |
| [TBHP] <sub>0</sub> (mol.L <sup>-1</sup> ) <sup>c</sup> | 1.50 10 <sup>-2</sup> | 2.00 10 <sup>-2</sup> | 2.00 10 <sup>-3</sup> | 3.50 10 <sup>-3</sup> | 2.50 10 <sup>-3</sup> | 3.50 10 <sup>-3</sup> | 3.00 10 <sup>-3</sup> | 2.50 10 <sup>-3</sup> | 2.50 10 <sup>-3</sup> | 1.50 10 <sup>-3</sup> | 2.00 10 <sup>-3</sup> |
| [AsAc] <sub>0</sub> (mol.L <sup>-1</sup> ) <sup>c</sup> | 7.50 10 <sup>-3</sup> | 1.00 10 <sup>-2</sup> | 1.00 10 <sup>-3</sup> | 1.75 10 <sup>-3</sup> | 1.25 10 <sup>-3</sup> | 1.75 10 <sup>-3</sup> | 1.50 10 <sup>-3</sup> | 1.25 10 <sup>-3</sup> | 1.25 10 <sup>-3</sup> | 7.5 10 <sup>-4</sup>  | 1.00 10 <sup>-3</sup> |
| [PABTC] <sub>0</sub> /[TBHP] <sub>0</sub> <sup>d</sup>  | 20.0                  | 8.1                   | 55.8                  | 24.2                  | 26.4                  | 15.5                  | 15.3                  | 26.4                  | 21.6                  | 30.5                  | 19.4                  |

<sup>a</sup> Represents the sum of the volume of the monomer added + volume of solvent + V<sub>total</sub> from the previous block. <sup>b</sup> Represents the concentration of the monomer at the beginning of each block extension. <sup>c</sup> The concentration of TBHP/AsAc at the beginning of each block, assuming full consumption of both TBHP and AsAc in the previous block. <sup>d</sup> The theoretical ratio of PABTC chain transfer agent to TBHP oxidant, assuming full consumption of TBHP in previous block.

**Table S20** - Monomer conversion and DMF-SEC analysis of the low DP acrylate octablock copolymer (blocks 1-4, 5b-8b) and the low DP acrylate/acrylamido heptablock copolymer (1-4, 5a-7a) prepared via RAFT in H<sub>2</sub>O/dioxane at 25 °C using TBHP/AsAc redox pair as initiator.

| Block | Multiblock copolymer composition                                                                                                                                                                                                            | Overall monomer conversion (%) <sup>a</sup> | $M_{n,th}$ (g.mol <sup>-1</sup> ) <sup>b</sup> | $M_{n,SEC}$ (g.mol <sup>-1</sup> ) <sup>c</sup> | $\bar{D}^c$ |
|-------|---------------------------------------------------------------------------------------------------------------------------------------------------------------------------------------------------------------------------------------------|---------------------------------------------|------------------------------------------------|-------------------------------------------------|-------------|
| 1     | PHEA <sub>10</sub>                                                                                                                                                                                                                          | >99                                         | 1400                                           | 3200                                            | 1.19        |
| 2     | PHEA <sub>10</sub> - <i>b</i> -PAA <sub>10</sub>                                                                                                                                                                                            | 96                                          | 2100                                           | 3100                                            | 1.23        |
| 3     | PHEA <sub>10</sub> - <i>b</i> -PAA <sub>10</sub> - <i>b</i> -PPEGA <sub>5</sub>                                                                                                                                                             | >99                                         | 4500                                           | 7000                                            | 1.22        |
| 4     | PHEA <sub>10</sub> - <i>b</i> -PAA <sub>10</sub> - <i>b</i> -PPEGA <sub>5</sub> - <i>b</i> -PMA <sub>10</sub>                                                                                                                               | >99                                         | 5300                                           | 8400                                            | 1.27        |
| 5a    | PHEA <sub>10</sub> - <i>b</i> -PAA <sub>10</sub> - <i>b</i> -PPEGA <sub>5</sub> - <i>b</i> -PMA <sub>10</sub> - <i>b</i> -PNAM <sub>10</sub>                                                                                                | >99                                         | 6700                                           | 9000                                            | 1.33        |
| 6a    | PHEA <sub>10</sub> - <i>b</i> -PAA <sub>10</sub> - <i>b</i> -PPEGA <sub>5</sub> - <i>b</i> -PMA <sub>10</sub> - <i>b</i> -PNAM <sub>10</sub> - <i>b</i> -PNIPAM <sub>10</sub>                                                               | >99                                         | 7900                                           | 13000                                           | 1.20        |
| 7a    | PHEA <sub>10</sub> - <i>b</i> -PAA <sub>10</sub> - <i>b</i> -PPEGA <sub>5</sub> - <i>b</i> -PMA <sub>10</sub> - <i>b</i> -PNAM <sub>10</sub> - <i>b</i> -PNIPAM <sub>10</sub> - <i>b</i> -PDMA <sub>10</sub>                                | >99                                         | 8800                                           | 15500                                           | 1.24        |
| 5b    | PHEA <sub>10</sub> - <i>b</i> -PAA <sub>10</sub> - <i>b</i> -PPEGA <sub>5</sub> - <i>b</i> -PMA <sub>10</sub> - <i>b</i> -PHEA <sub>10</sub>                                                                                                | >99                                         | 6500                                           | 11600                                           | 1.26        |
| 6b    | PHEA <sub>10</sub> - <i>b</i> -PAA <sub>10</sub> - <i>b</i> -PPEGA <sub>5</sub> - <i>b</i> -PMA <sub>10</sub> - <i>b</i> -PHEA <sub>10</sub> - <i>b</i> -PEGMEA <sub>10</sub>                                                               | >99                                         | 7800                                           | 12500                                           | 1.38        |
| 7b    | PHEA <sub>10</sub> - <i>b</i> -PAA <sub>10</sub> - <i>b</i> -PPEGA <sub>5</sub> - <i>b</i> -PMA <sub>10</sub> - <i>b</i> -PHEA <sub>10</sub> - <i>b</i> -PEGMEA <sub>10</sub> - <i>b</i> -PPEGA <sub>5</sub>                                | >99                                         | 10200                                          | 16700                                           | 1.42        |
| 8b    | PHEA <sub>10</sub> - <i>b</i> -PAA <sub>10</sub> - <i>b</i> -PPEGA <sub>5</sub> - <i>b</i> -PMA <sub>10</sub> - <i>b</i> -PHEA <sub>10</sub> - <i>b</i> -PEGMEA <sub>10</sub> - <i>b</i> -PPEGA <sub>5</sub> - <i>b</i> -PHEA <sub>10</sub> | >99                                         | 11300                                          | 20800                                           | 1.34        |

<sup>a</sup> Determined by <sup>1</sup>H NMR using eq. 1. <sup>b</sup> Determined using eq. 2. <sup>c</sup> Determined using DMF-SEC

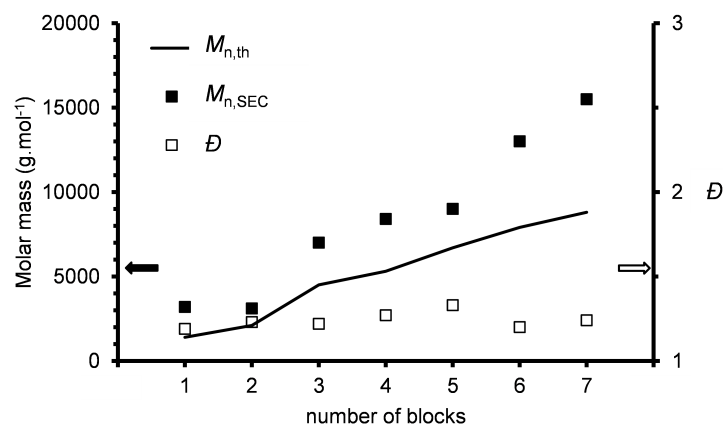

**Figure S10** - Evolution of molar mass and dispersity values (determined by DMF-SEC) with each block extension for the low DP acrylate/acrylamido heptablock copolymer prepared *via* RAFT in H<sub>2</sub>O/dioxane at 25 °C using TBHP/AsAc redox pair as initiator.

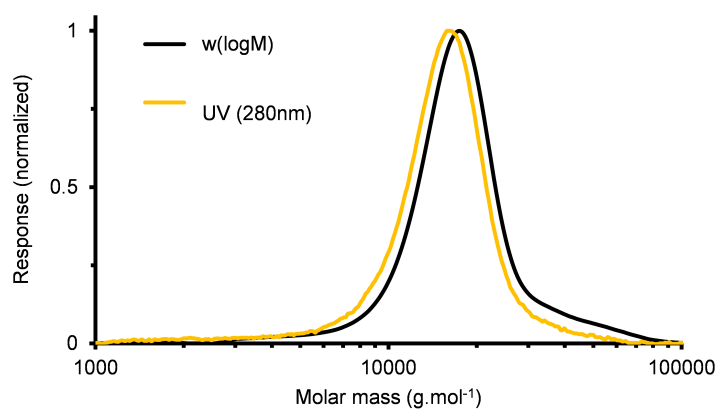

**Figure S11** - DMF-SEC chromatogram of the low DP acrylate/acrylamido heptablock copolymer prepared *via* RAFT in H<sub>2</sub>O/dioxane at 25 °C using TBHP/AsAc redox pair as initiator, showing the (normalized)  $w(\log M)$  and 280 nm UV detector responses.



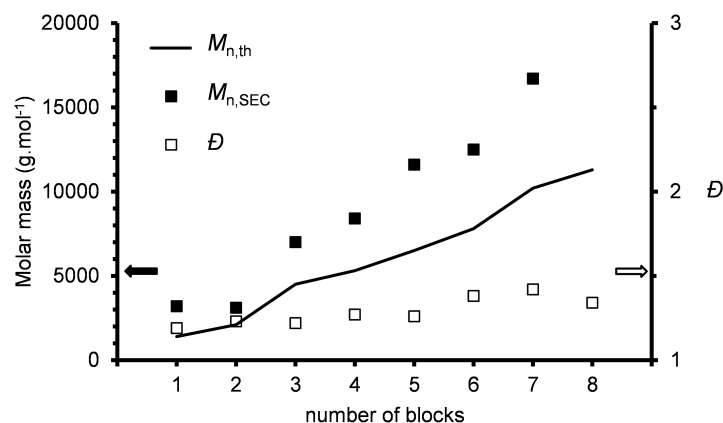

**Figure S12** - Evolution of molar mass and dispersity values (determined by DMF-SEC) with each block extension for the low DP acrylate octablock copolymer prepared *via* RAFT in H<sub>2</sub>O/dioxane at 25 °C using TBHP/AsAc redox pair as initiator.

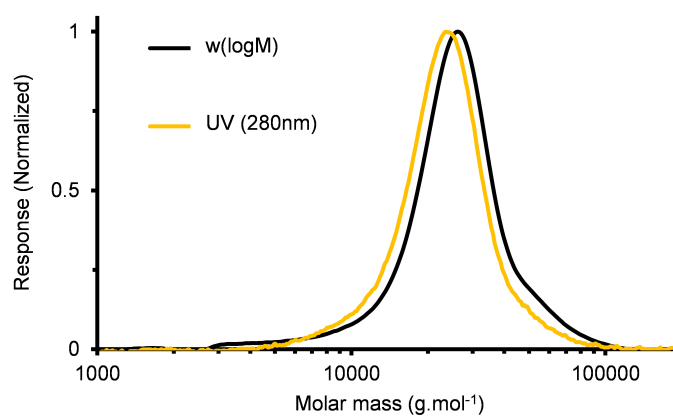

**Figure S13** - DMF-SEC chromatogram of the low DP acrylate octablock copolymer prepared *via* RAFT in H<sub>2</sub>O/dioxane at 25 °C using TBHP/AsAc redox pair as initiator, showing the (normalized)  $w(\log M)$  and 280 nm UV detector responses.

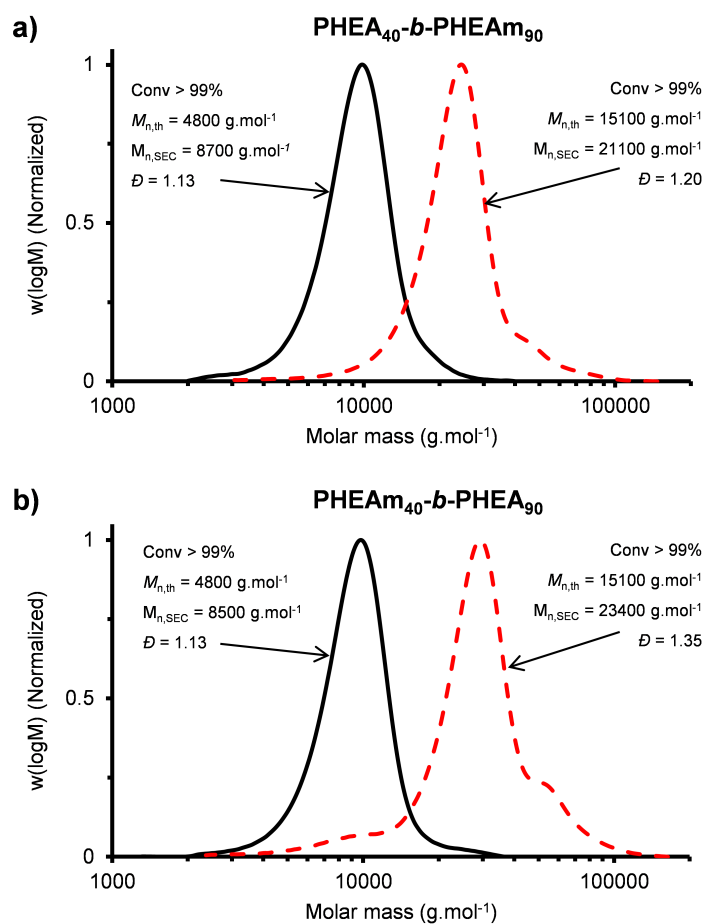

**Figure S14** - DMF-SEC chromatograms for diblock copolymers a) PHEA<sub>40</sub>-*b*-PHEAm<sub>90</sub> and b) PHEAm<sub>40</sub>-*b*-PHEA<sub>90</sub>) prepared in one-pot *via* RAFT in H<sub>2</sub>O/dioxane at 44 °C using VA-044 as thermal azoinitiator. Note the high molecular weight shoulders are due to diacrylate impurity in the HEA non-purified monomer (Figure S3)

**Table S21-** Summary of conditions and characterization of PHEA<sub>40</sub>-*b*-PHEAm<sub>90</sub> and PHEAm<sub>40</sub>-*b*-PHEA<sub>90</sub> diblocks prepared in one-pot *via* RAFT in H<sub>2</sub>O/dioxane at 44 °C using VA-044 as initiator.

| Diblock copolymer<br>composition                   | [M] <sub>0</sub><br>(mol.L <sup>-1</sup> ) <sup>a</sup> | [PABTC] <sub>0</sub><br>(mol.L <sup>-1</sup> ) | [VA-044] <sub>0</sub><br>(mol.L <sup>-1</sup> ) <sup>b</sup> | [PABTC] <sub>0</sub> /<br>[VA-044] <sub>0</sub> | Monomer<br>Conversion<br>(%) <sup>c</sup> | <i>M</i> <sub>n,th</sub><br>(g.mol <sup>-1</sup> ) <sup>d</sup> | <i>M</i> <sub>n,SEC</sub><br>(g.mol <sup>-1</sup> ) <sup>e</sup> | <i>Đ</i> <sup>e</sup> |
|----------------------------------------------------|---------------------------------------------------------|------------------------------------------------|--------------------------------------------------------------|-------------------------------------------------|-------------------------------------------|-----------------------------------------------------------------|------------------------------------------------------------------|-----------------------|
| PHEA <sub>40</sub>                                 | 4.0                                                     | 0.10                                           | 10.0                                                         | 10                                              | >99                                       | 4800                                                            | 8700                                                             | 1.13                  |
| PHEA <sub>40</sub> - <i>b</i> -PHEAm <sub>90</sub> | 2.8                                                     | 0.03                                           | 19.7                                                         | 22                                              | >99                                       | 15100                                                           | 21200                                                            | 1.20                  |
| PHEAm <sub>40</sub>                                | 4.0                                                     | 0.10                                           | 10.0                                                         | 10                                              | >99                                       | 4800                                                            | 8500                                                             | 1.13                  |
| PHEAm <sub>40</sub> - <i>b</i> -PHEA <sub>90</sub> | 2.8                                                     | 0.03                                           | 19.7                                                         | 22                                              | >99                                       | 15100                                                           | 23400                                                            | 1.35                  |

<sup>a</sup> Represents the concentration of the monomer at the beginning of each block extension. <sup>b</sup> Takes into account the amount of initiator added and the amount of initiator remaining following the synthesis of the previous block. <sup>c</sup> Determined by <sup>1</sup>H NMR using eq. 1. <sup>d</sup> Determined using eq. 2. <sup>e</sup> Determined using DMF-SEC.
